# Supplementary material for: Minimally invasive versus open radical resection surgery for hilar cholangiocarcinoma: Comparable outcomes associated with advantages of minimal invasiveness
Source: PubMed Central journal article supplement (PMC7951922; doi:10.1371/journal.pone.0248534), 2021-03-11
Supplement: pone.0248534.s001.pdf [file pone.0248534.s001.pdf]

|    |                                                                                     |
|----|-------------------------------------------------------------------------------------|
| #1 | (hilar cholangiocarcinoma) OR (perihilar cholangiocarcinoma) OR (klatskin's tumour) |
| #2 | robotic OR laparoscopic OR open                                                     |
| #3 | #1 AND #2                                                                           |
